# Supplementary material for: Crocetin exploits p53-induced death domain (PIDD) and FAS-associated death domain (FADD) proteins to induce apoptosis in colorectal cancer
Source: PubMed Central journal article supplement (PMC5020693; doi:10.1038/srep32979), 2016-09-13
Supplement: srep32979-s1.pdf [file srep32979-s1.pdf]

**Crocetin exploits p53-induced death domain (PIDD) and FAS-associated death domain (FADD) proteins to induce apoptosis in colorectal cancer**

*Pallab Ray<sup>ξ</sup>, Deblina Guha<sup>ξ</sup>, Juni Chakraborty, Shuvomoy Banerjee, Arghya Adhikary, Samik Chakraborty, Tanya Das<sup>1</sup> and Gaurisankar Sa\**

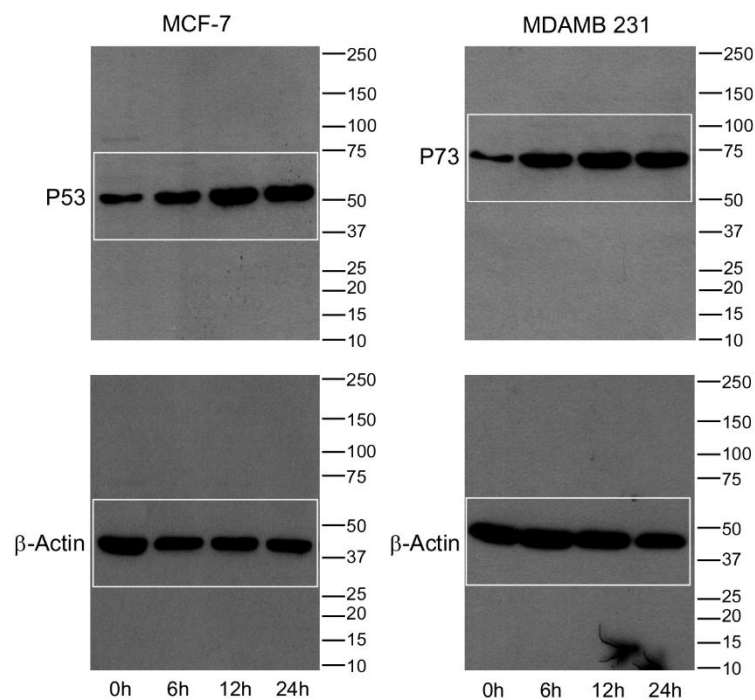

**Supplementary Figure-1. Crocetin induces p53 and p73 in breast cancer cell lines bearing different p53 status.** Wild-type p53-expressing MCF-7 cells and mutated p53-expressing MDAMB 231 cells treated with crocetin (100 $\mu$ M) at different time points were subjected to Western blot analysis for determination of status of p53 and p73 respectively.
